# Supplementary material for: Emergence of Methicillin-Resistant Staphylococcus aureus ST239/241 SCCmec-III Mercury in Eastern Algeria
Source: MDPI journal article supplement (doi:10.3390/pathogens10111503), 2021-11-18
Supplement: s1 [file s1]

**Table S1:** Predicted function of genes shown on Figure 2.

| Gene name          | length (bp) | %GC content | Predicted functions                                           |
|--------------------|-------------|-------------|---------------------------------------------------------------|
| <i>ADP-rib</i>     | 573         | 28,97       | ADP-ribosyltransferase                                        |
| <i>HP</i>          | 1032        | 27,03       | hypothetical protein                                          |
| <i>HP</i>          | 288         | 34,72       | hypothetical protein                                          |
| <i>HP</i>          | 1569        | 36,71       | hypothetical protein                                          |
| <i>HP</i>          | 276         | 32,97       | hypothetical protein                                          |
| <i>recombinase</i> | 1347        | 34,15       | casette chrs recombinase A3                                   |
| <i>recombinase</i> | 1629        | 35,73       | casette chrs recombinase B3                                   |
| <i>HP</i>          | 351         | 33,33       | hypothetical protein                                          |
| <i>HP</i>          | 90          | 30,00       | hypothetical protein                                          |
| <i>HP</i>          | 312         | 32,37       | hypothetical protein                                          |
| <i>HP</i>          | 522         | 32,18       | hypothetical protein                                          |
| <i>HP</i>          | 207         | 29,95       | hypothetical protein                                          |
| <i>RadC</i>        | 324         | 34,26       | RadC domain protein                                           |
| <i>Phage int</i>   | 1893        | 33,60       | Tphage integrase family protein                               |
| <i>Tn554</i>       | 378         | 30,16       | transposase                                                   |
| <i>cadC</i>        | 366         | 33,61       | Cadmium resistance transcriptional regulatory protein CadC    |
| <i>cadA</i>        | 2415        | 40,54       | Cadmium-transporting ATPase                                   |
| <i>cadD</i>        | 687         | 34,79       | Cadmium resistance transporter                                |
| <i>tauE</i>        | 630         | 33,02       | sulfite exporter TauE/SafE family protein                     |
| <i>cstR</i>        | 261         | 24,90       | persulfide-sensing transcriptional repressor CstR             |
| <i>dsrE</i>        | 1065        | 32,30       | dihydroneopterin aldolase                                     |
| <i>cstB</i>        | 939         | 33,12       | persulfide dioxygenase-sulfurtransferase CstB                 |
| -                  | 261         | 30,65       | rhodanese-like domain-containing protein                      |
| <i>roK</i>         | 1149        | 28,72       | ROK family protein                                            |
| -                  | 143         | 30,77       | psm_mec_RNA                                                   |
| <i>mecI</i>        | 204         | 27,45       | Methicillin resistance regulatory protein MecI                |
| <i>mecR1</i>       | 1542        | 28,47       | beta-lactam sensor/signal transducer MecR1                    |
| <i>mecA</i>        | 2007        | 30,59       | PBP2a beta-lactam-resistant peptidoglycan transpeptidase MecA |
| <i>maoC</i>        | 429         | 29,14       | MaoC family dehydratase                                       |
| <i>ugpQ</i>        | 744         | 33,47       | Glycerophosphoryl diester phosphodiesterase                   |
| <i>HP</i>          | 231         | 35,06       | hypothetical protein                                          |
| -                  | 168         | 29,17       | HMG-CoA synthase                                              |
| <i>IS431mec</i>    | 675         | 34,37       | IS6 family transposase IS431mec                               |
| <i>repN</i>        | 945         | 32,17       | Replication initiation protein                                |
| -                  | 95          | 33,68       | ctRNA_pT181                                                   |
| <i>HP</i>          | 102         | 26,47       | hypothetical protein                                          |
| <i>rec3</i>        | 1242        | 30,19       | plasmid recombination protein                                 |
| <i>MFS</i>         | 549         | 28,96       | MFS transporter                                               |
| <i>tetK</i>        | 888         | 28,04       | tetracycline efflux MFS transporter Tet(K)                    |
| <i>IS6</i>         | 357         | 32,49       | IS6 family transposase                                        |
| <i>dnaP</i>        | 1218        | 31,61       | DNA primase                                                   |
| -                  | 117         | 34,19       | hypothetical protein                                          |
| <i>ccrC</i>        | 1680        | 33,27       | Recombinase family protein                                    |

|                 |      |       |                                                              |
|-----------------|------|-------|--------------------------------------------------------------|
| -               | 339  | 27,73 | hypothetical protein                                         |
| -               | 90   | 35,56 | hypothetical protein                                         |
| -               | 312  | 33,65 | hypothetical protein                                         |
| -               | 504  | 36,11 | hypothetical protein                                         |
| -               | 222  | 26,58 | hypothetical protein                                         |
| <i>atpase</i>   | 1977 | 27,26 | AAA family ATPase                                            |
| <i>mcrBC</i>    | 1323 | 26,68 | Putative McrBC 5-methylcytosine restriction system component |
| <i>hsdR</i>     | 3120 | 35,54 | Type I restriction endonuclease subunit R                    |
| <i>hsdS</i>     | 1230 | 26,99 | Restriction endonuclease subunit S                           |
| <i>hsdM</i>     | 1515 | 33,40 | Type I restriction-modification system subunit M             |
| <i>cdnS</i>     | 996  | 25,70 | Cyclic dipyrimidine nucleotide synthase                      |
| -               | 549  | 28,96 | hypothetical protein                                         |
| -               | 333  | 29,43 | Membrane protein                                             |
| <i>lytTR</i>    | 243  | 31,28 | LytTR family transcriptional regulator                       |
| <i>IS431mec</i> | 675  | 34,37 | IS6 family transposase IS431mec                              |
| -               | 243  | 31,28 | LytTR family transcriptional regulator                       |
| <i>HP</i>       | 333  | 29,43 | hypothetical protein                                         |
