# Supplementary material for: Emergence of Methicillin-Resistant Staphylococcus aureus ST239/241 SCCmec-III Mercury in Eastern Algeria
Source: MDPI journal article supplement (doi:10.3390/pathogens10111503), 2021-11-18
Supplement: s1 [file s1]

**Table S4.** Primers and probes used in this study for the molecular characterisation of the clinical *S. aureus* isolates from MICU at UHCC.

| Primers or probes                  | Oligonucleotides (5'-3')          | References |
|------------------------------------|-----------------------------------|------------|
| ccrB Type I                        |                                   | [53]       |
| F_ <i>ccrB</i> Type I              | TTTGGCACGTAATACTTCCGATT           |            |
| R_ <i>ccrB</i> Type I              | AAAATTCAACATTTTGGCGATGA           |            |
| P_ <i>ccrB</i> Type I              | ACTTACAATAGTCGAAGAAC              |            |
| ccrB Type 1I                       |                                   |            |
| F_ <i>ccrB</i> Type II             | AACGAGACGTGCCCAAGAAG              |            |
| R_ <i>ccrB</i> Type II             | CATCAGTTCATGTTTACTATTAGGTATTTTGTC |            |
| P_ <i>ccrB</i> Type II             | ATTTGCCGCTGGGCT                   |            |
| ccrB Type 1II                      |                                   |            |
| F_ <i>ccrB</i> Type III            | ACAATCCACAGTCATTACAT              |            |
| R_ <i>ccrB</i> Type III            | AGTTACGACTTTCTGTTTCA              |            |
| P_ <i>ccrB</i> Type III            | ACAAGTCACCGAACGCATCCAACAAA        |            |
| ccrB Type 1V                       |                                   |            |
| F_ <i>ccrB</i> Type IV             | GAACAGACCTGAGCTCCAACGT            |            |
| R_ <i>ccrB</i> Type IV             | TCGGTTTGTGTTTGTAGATCATAACACA      |            |
| P_ <i>ccrB</i> Type IV             | ATGCAAAAGAAGGCAATAT               |            |
| SCC <i>mec</i> V                   |                                   | [54]       |
| Type V-F                           | TCTGGGAGTTCTGCCTGTCA              |            |
| Type V-R                           | TCACATTTGACGCAATCTGCT             |            |
| Type V-P                           | TGCTGAAGTCGTCGAACGCGTAATCA        |            |
| SCC <i>mec</i> III mercury element |                                   | [14]       |
| Type III-F                         | CCATATTGTGTACGATGCG               |            |
| Type III-R                         | CCTTAGTTGTCGTAACAGATCG            |            |
| <i>Spa</i>                         |                                   | [31]       |
| <i>Spa</i> -1113f                  | TAAAGACGATCCTTCGGTGAG C           |            |
| <i>Spa</i> -1514r                  | CAGCAGTAGTGCCGTTTGCTT             |            |
| PVL                                |                                   | [53]       |
| <i>pvl</i> -F                      | AAAATGCCAGTGTTATCCAGAGGTA         |            |
| <i>pvl</i> -R                      | TTTGCAGCGTTTTGTTTTCG              |            |
| <i>pvl</i> -P                      | CTTCAATCCAGAATTTATTGGTGT          |            |
| TSST-1                             |                                   | [54]       |
| <i>tsst-1-F</i>                    | TCATCAGCTAACTCAAATACATGGATT       |            |
| <i>tsst-1-R</i>                    | TGTGGATCCGTCATTGTT                |            |
| <i>tsst-1-P</i>                    | TCCAATAACCACCCGTTTTATCGCTTGAA     |            |
| <i>mec</i> A                       |                                   |            |
| <i>mecA</i> -F                     | GTTAGATTGGGATCATAGCGTCATT         |            |
| <i>mecA</i> -R                     | TGCCTAATCTCATATGTGTTCTGTAT        |            |
| <i>mecA</i> -p                     | TTCCAGGAATGCAGAAAGACCAAAGCAT      |            |
| <i>mec</i> C                       |                                   | [55]       |
| <i>mecC</i> -F                     | GCAAGCAATAGAATCATCAGACAAC         |            |
| <i>mecC</i> -R                     | TCTTGCATACCTTGCTCAAATTTT          |            |
| <i>mecC</i> -P                     | CCGCATTGCATTAGCATTAGGAGCCA        |            |
